# Supplementary material for: The competition between template growth and catalytic growth of one-dimensional ZnS nanostructures: nanobelts or nanowires
Source: Royal Society of Chemistry journal article supplement (doi:10.1039/c3dt50301a), 2013-01-01
Supplement: c3dt50301a.pdf [file c3dt50301a.pdf]

## Electronic Supplementary Information (ESI)

### The competition between template growth and catalytic growth of one-dimensional ZnS nanostructures: nanobelts or nanowires

Tingting You,<sup>a</sup> Junli Wang,<sup>\*a</sup> Hui Feng,<sup>a</sup> Kangmin Chen,<sup>b</sup> Weiling Fan,<sup>a</sup> Chi Zhang<sup>\*a</sup>  
and Runsheng Miao<sup>b</sup>

<sup>a</sup>Scientific Research Academy, and School of Chemistry & Chemical Engineering,  
Jiangsu University, Zhenjiang 212013, Jiangsu, P. R. China. Fax/Tel: +86 511  
88797815; E-mail: junleewang@yahoo.com; chizhang@ujs.edu.cn

<sup>b</sup>School of Materials Science & Engineering, Jiangsu University, Zhenjiang 212013,  
Jiangsu, P. R. China.

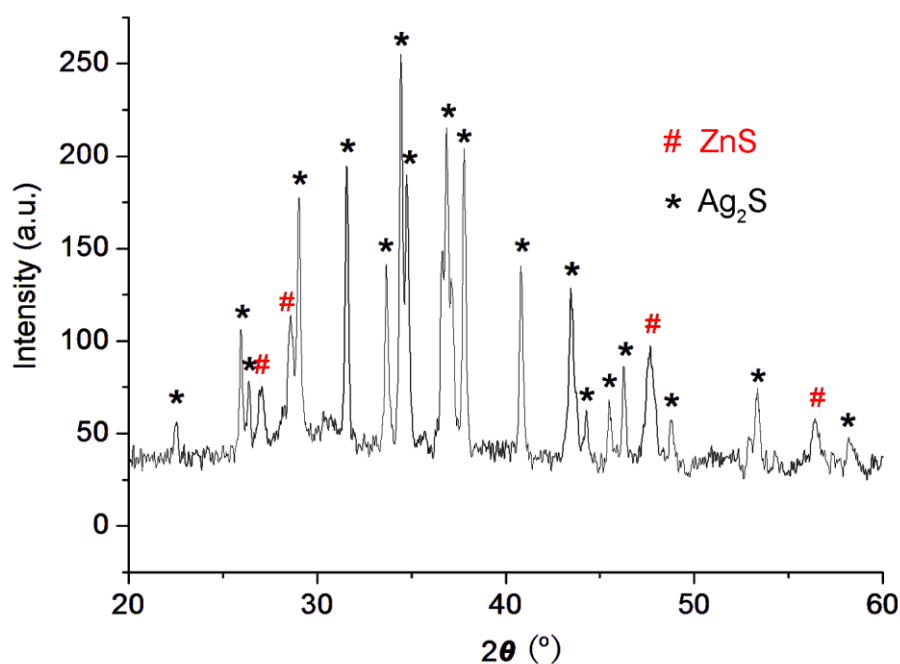

**Fig. S1** XRD pattern of the ZnS sample synthesized with an Ag/Zn molar ratio of 1:1 at 180 °C for 3 h. All the peaks can be assigned to hexagonal wurtzite ZnS (JCPDS No. 36–1450) and orthogonal Ag<sub>2</sub>S (JCPDS No. 89–3840).

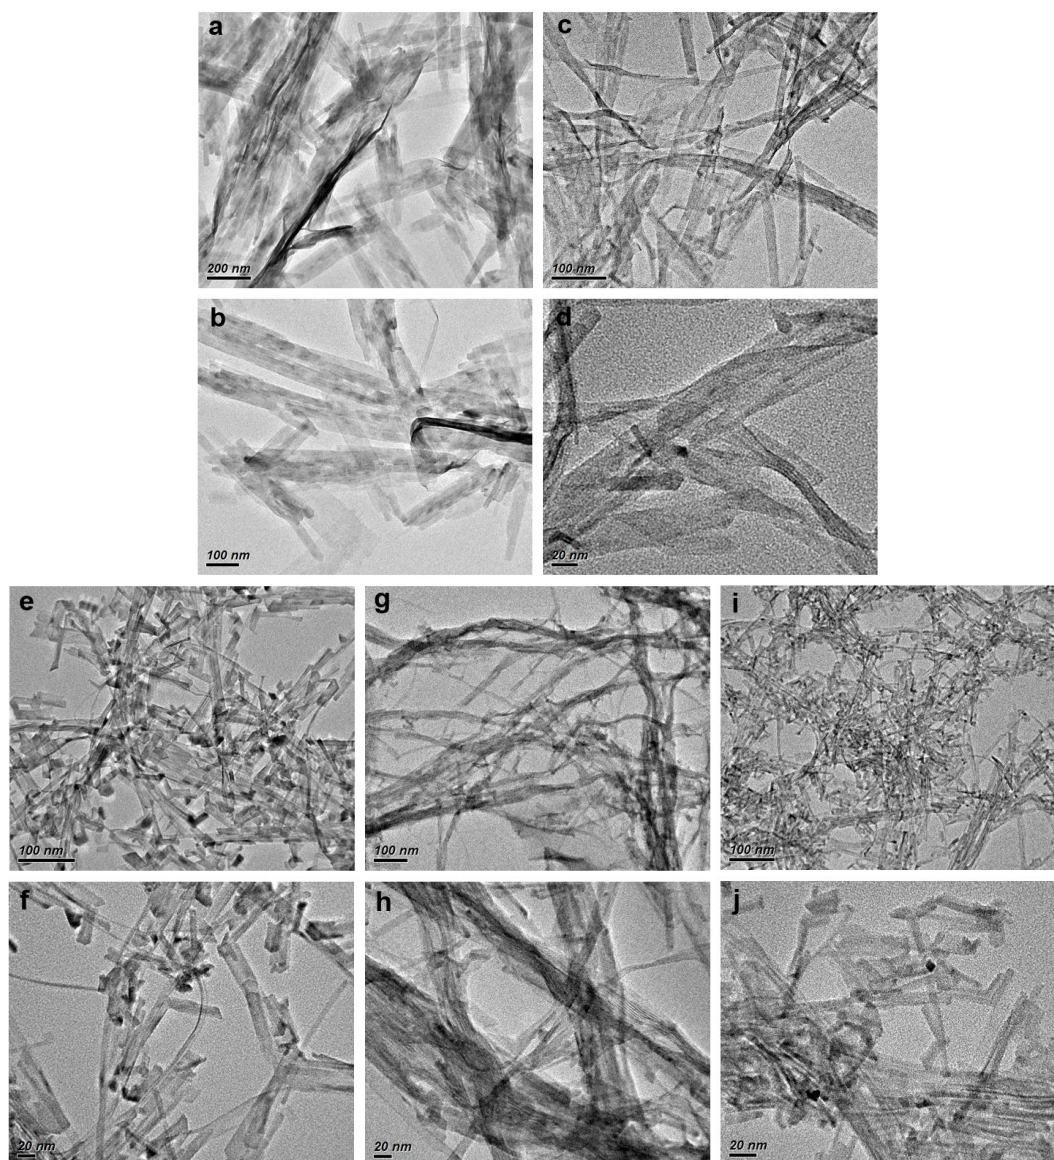

**Fig. S2** TEM images of ZnS nanobelts prepared before adding  $\text{AgNO}_3$  in various primary alkylamines: (a,b) propylamine, (c,d) butylamine, (e,f) hexylamine, (g,h) octylamine, and (i,j) dodecylamine.

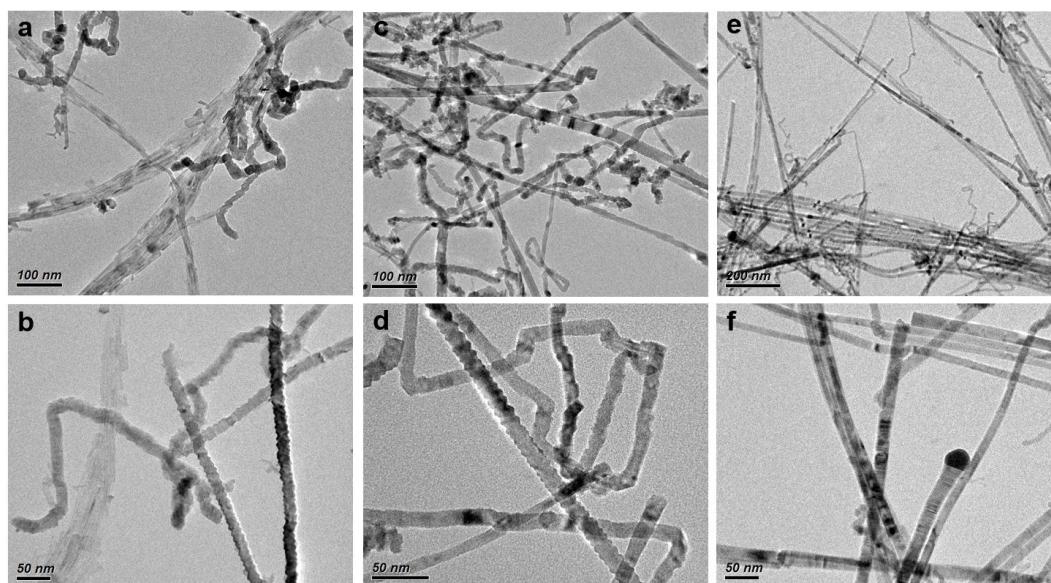

**Fig. S3** TEM images of the ZnS products prepared after adding  $\text{AgNO}_3$  in various primary alkylamines: (a,b) hexylamine, (c,d) octylamine, and (e,f) dodecylamine.

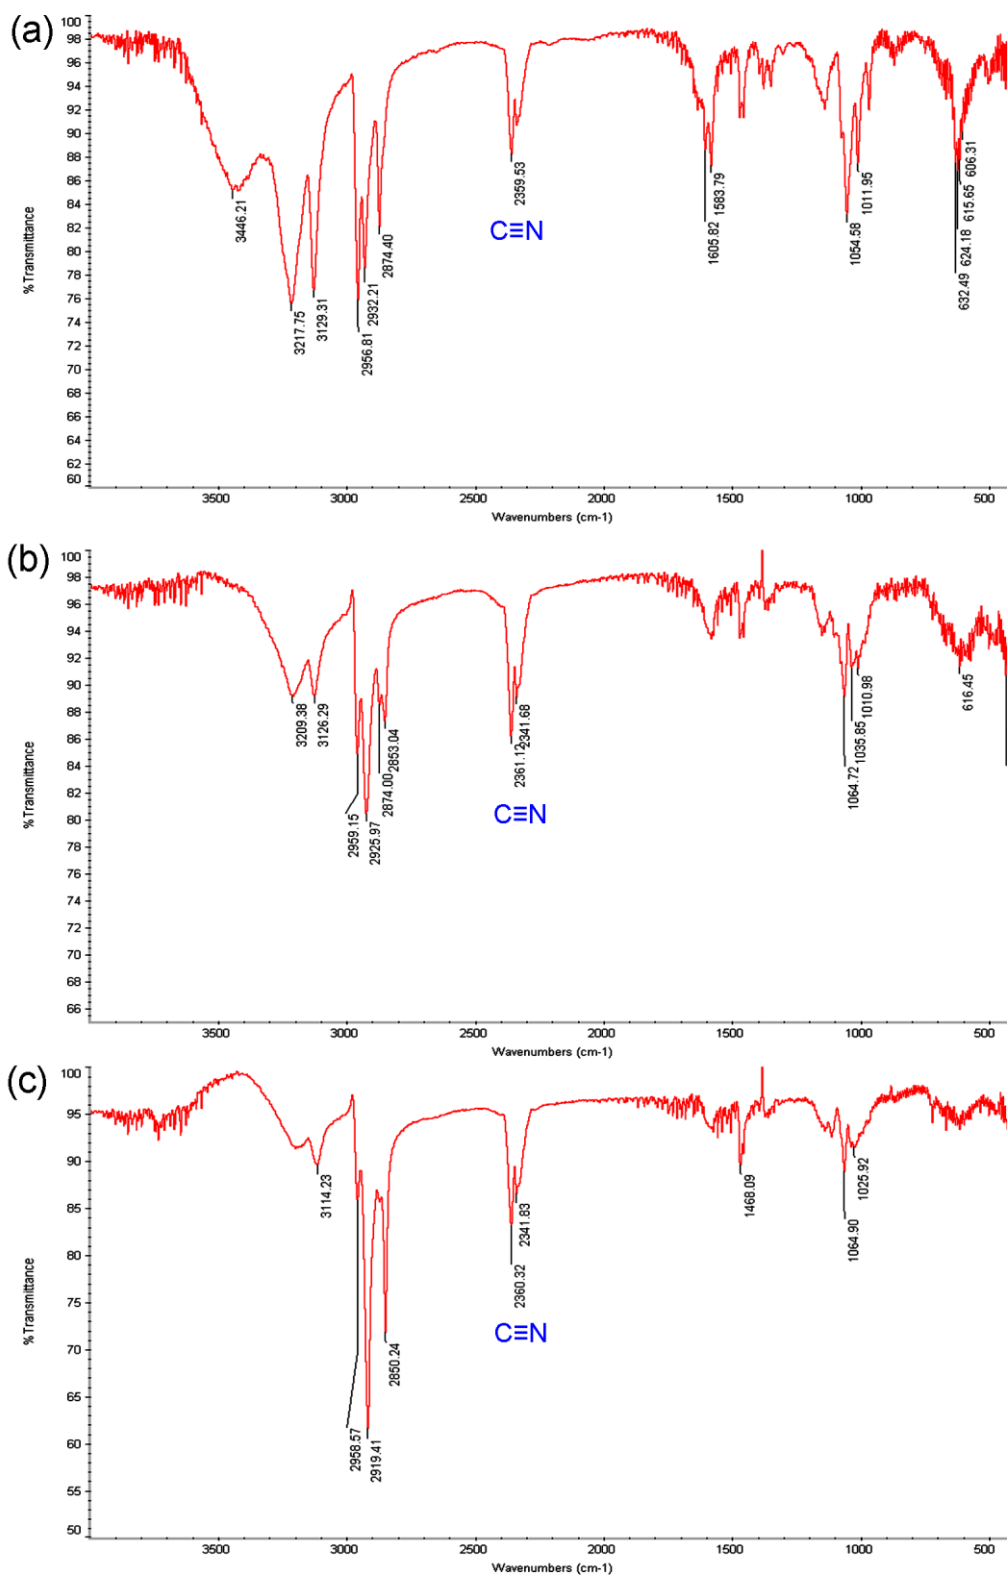

**Fig. S4** FTIR spectra recorded on ZnS nanobelts synthesized after adding AgNO<sub>3</sub> in various alkyl amines: (a) propylamine, (b) hexylamine, and (c) dodecylamine.
